# Supplementary material
Source: Atypon-hosted journal article supplement (doi:10.57264/cer-2026-0058)
Supplement: supplementary materials.docx [file supplementary%20materials.docx]

**Supplementary Table 1.** Interpretation of 12 items from the TIDieR checklist for PAP therapy.

| **TIDieR item (brief description)** | **Original TIDieR wording** | **Operationalization of the TIDieR item for PAP therapy** |
| --- | --- | --- |
| **1. Brief name** | Provide the name or a phrase that describes the intervention. | Name or phrase describing the intervention |
| **2. Why** | Describe any rationale, theory, or goal of the elements essential to the intervention. | Rationale, theory or goal essential for the application of intervention |
| **3. What (materials)** | Describe any physical or informational materials used in the intervention, including those provided to participants or used in intervention delivery or in training of intervention providers. Provide information on where the materials can be accessed (e.g. online appendix, URL). | Type of PAP device and manufacturer |
| **4. What (procedures)** | Describe each of the procedures, activities, and/or processes used in the intervention, including any enabling or support activities. | Instructions regarding usage of PAP device, mask fitting, and acclimatization |
| **5. Who provided** | For each category of intervention provider (e.g. psychologist, nursing assistant), describe their expertise, background and any specific training given. | Intervention provider expertise |
| **6. How** | Describe the modes of delivery (e.g. face-to-face or by some other mechanism, such as internet or telephone) of the intervention and whether it was provided individually or in a group. | Intervention delivery shown as usage of the device determined by assessment of symptomatology, extraction of PAP log data and⁄or polygraphy. |
| **7. Where** | Describe the type(s) of location(s) where the intervention occurred, including any necessary infrastructure or relevant features. | Type of research center and/or country where the intervention was provided |
| **8. When and how much** | Describe the number of times the intervention was delivered and over what period of time including the number of sessions, their schedule, and their duration, intensity or dose. | Duration of PAP therapy |
| **9. Tailoring** | If the intervention was planned to be personalised, titrated or adapted, then describe what, why, when, and how. | PAP titration |
| **10. Modifications** | If the intervention was modified during the course of the study, describe the changes (what, why, when, and how). | Change of the intervention at the level of all participants |
| **11. How well (planned)** | Planned: If intervention adherence or fidelity was assessed, describe how and by whom, and if any strategies were used to maintain or improve fidelity, describe them. | Assessment whether the intervention was delivered as planned; planned strategies for adherence |
| **12. How well (actual)** | Actual: If intervention adherence or fidelity was assessed, describe the extent to which the intervention was delivered as planned. | Recorded adherence rate or number of participants who were excluded from the trial due to inadequate compliance |

*Abbreviations: TIDieR,* Template for Intervention Description and Replication; PAP, positive airway pressure **Supplementary Table 2.** Characteristics of trial conduct in 299 trials for PAP therapy registered in ClinicalTrials.gov.

| **Conduct characteristics** | **No. (%) of trials** |
| --- | --- |
| *Location:* |  |
| US | 103 (34.4) |
| Non-US | 101 (33.8) |
| EU | 68 (22.7) |
| UK | 4 (1.3) |
| Two countries a | 8 (2.7) |
| Not provided | 15 (5.0) |
| *Sponsor:* |  |
| University | 145 (48.5) |
| Pharmaceutical industry | 67 (22.4) |
| Health care organization | 36 (12.0) |
| Community-based organization | 31 (10.4) |
| Individual person | 14 (4.7) |
| Non-profit organization | 6 (2.0) |
| *Funder:* |  |
| Industry | 54 (18.1) |
| US Fed | 13 (4.3) |
| Industry + NIH | 1 (0.3) |
| Other b | 231 (77.3) |
| *Start year* |  |
| Provided (median 2012, 95% CI 2012-2013, range 2002-2022) | 297 (99.3) |
| Not provided | 2 (0.7) |
| *Primary completion year c* |  |
| Provided (median 2015, 95% CI 2015-2016, range 2006-2023) | 291 (97.3) |
| Not provided | 8 (2.7) |
| *Study completion year d* |  |
| Provided (median 2015, 95% CI 2015-2016, range 2005-2025) | 295 (98.7) |
| Not provided | 4 (1.3) |

*Abbreviations:* PAP, positive airway pressure; US, United States; UK, United Kingdom; EU, European Union; NIH, National Institutes of Health; US Fed, United States Federal agencies

a Among trials located in two countries five of them were US together with Australia, Germany, Canada or Israel, two were Switzerland together with UK or France and one was Canada with France.

b Among trials that noted funder as “other“ 177 (76.6%) of them had that term alone, others provided combination of term “other“ with industry (10.8%), NIH (10.8%), US Fed (0.9%), industry + US Fed (0.4%) and industry + NIH (0.4%).

c According to the CT.gov Glossary of common terms: “The date on which the last participant in a clinical trial was examined or received an intervention to collect final data for the primary outcome measure.”

d According to the CT.gov Glossary of common terms: “The date on which the last participant in a clinical trial was examined or received an intervention/treatment to collect final data for the primary outcome measures, secondary outcome measures, and adverse events.”
